# Supplementary material for: A comparison of visual outcome and rotational stability of two types of toric implantable collamer lenses (TICL) : V4 versus V4c
Source: PLoS One. 2017 Aug 28;12(8):e0183335. doi: 10.1371/journal.pone.0183335 (PMC5573270; doi:10.1371/journal.pone.0183335)
Supplement: S1 Data — (XLSX) [file pone.0183335.s001.xlsx]

## Sheet: Sheet1
ID	Type of TICL	Age	R/L	Sex	follow-up period(months)	Preoperative spherical equivalent	Preoperative refractive cylinder	Preoperative UCVA(LogMAR)	Preoperative BCVA(LogMAR)	preoperative IOP	Preoperative endothelial cell count	Postoperative UCVA (LogMAR)	Postoperative BCVA(LogMAR)	Postoperatvie Spherical equivalent	누적SE	SE0.5기준	Postoperative Cylinder	Postoperative IOP	Postoperative endothelial cell count	ICL spherical power	ICL Spherical power * 0.78	ICL cylinder power	Rotation	Postoperative central vault	Intraoperative adjustment	Index of success	Target induced astigmatism	Surgically induced astigmatism	Efficacy	Safety	PREorPOST	누적Cyl	Cyl1.5이하	PostVault	PreSE_plus	AchiSE_plus	postSE분류	Rotation방향	Difference vector	Correction index	Magnitude of error
1	V4	26	R	M	8	-9.18	-1.75	1.7	0	11	2421	0.05	0	0.56	3	2	-0.5	15	2661	-16	-12.48	2	5	483	2	0.21498	1.64	1.31	0.9	1	1	1	1	1	9.18	9.74	7	1	0.35	0.8	-0.34
2	V4	28	L	F	3	-10.16	-1.5	1.7	0	11.1	3194	0	0	-0.25	1	1	-0.5	8.9	3225	-15.5	-12.09	1	3	535	12	0.63762	1.22	1.99	1	1	1	1	1	1	10.16	9.91	4	1	0.78	1.62	0.76
3	V4	41	L	F	13	-7.63	-1.75	0.52	0.05	13	2288	0.05	0	-0.25	1	1	-0.5	13	2628	-12	-9.36	2	7	1162.5	21	0.25339	1.7	1.4	1	1.11	1	1	1	2.5	7.63	7.38	4	1	0.43	0.83	-0.29
4	V4	32	R	F	13	-11.15	-3.75	0.7	0	15	3472	0.1	0	0.04	1	1	-1	15	2924	-17	-13.26	5	3	485	3	0.21425	3.5	2.75	0.8	1	1	2	1	1	11.15	11.19	5	1	0.75	0.79	-0.75
5	V4	45	L	F	18	-13.13	-2.75	1.7	0.15	18	2604	0.15	0.05	-0.5	2	1	0	18.6	2583	-18.5	-14.43	3	0	694.5	15	0.10758	2.51	2.75	1	1.29	1	1	1	1	13.13	12.63	4	1	0.27	1.1	0.24
6	V4	23	R	M	6	-10.24	-2.25	2	0	14	3048	0	0	-0.75	3	2	-1	15	2857	-16.5	-12.87	3	4	568	4	0.33272	1.92	1.34	1	1	1	2	1	1	10.24	9.49	3	2	0.64	0.69	-0.59
7	V4	25	R	M	10	-13.5	-5	0.7	0.3	16	2538	0	0	-0.13	1	1	-0.75	15.5	2463	-21	-16.38	5	11	583	8	0.13788	4.94	4.49	2	2	1	2	1	1	13.5	13.37	5	1	0.68	0.91	-0.45
8	V4	18	R	F	9	-11.88	-5.25	0.82	0.05	21	2849	0	0	-0.88	5	2	-1.25	18	2673	-19.5	-15.21	6	9	888	1	0.23391	5.22	4.02	1.11	1.11	1	3	1	1.5	11.88	11	3	1	1.22	0.77	-1.19
9	V4	36	L	F	1	-10.01	-1.5	0.82	0.05	16	2923	0.1	0	0.13	1	1	-0.25	15	2866	-15	-11.7	2	0	454	10	0.0882	1.23	1.34	0.89	1.11	1	1	1	1	10.01	10.14	5	1	0.11	1.09	0.11
10	V4	41	R	F	13	-8.75	-2	0.52	0.15	12	2463	0.05	0	-0.25	1	1	-0.5	15	2704	-13.5	-10.53	2	0	729	3	0.17983	1.91	1.65	1.29	1.43	1	1	1	1.5	8.75	8.5	4	1	0.34	0.86	-0.26
11	V4	25	L	F	4	-15.68	-3.5	1	0	17	3344	0	0	-1.25	6	2	-1	19.3	3571	-23	-17.94	3.5	6	1062	10	0.24998	3.38	2.6	1	1	1	2	1	2	15.68	14.43	2	1	0.84	0.77	-0.78
12	V4	24	L	F	11	-9	-1.5	1.52	0	14	2967	0	0	-0.25	1	1	-0.5	14.1	3107	-14	-10.92	2	0	471	10	0.22181	1.34	1.04	1	1	1	1	1	1	9	8.75	4	1	0.3	0.78	-0.3
13	V4	36	R	M	6	-9.23	-1.5	2	0	15	3533	0	0	-0.25	1	1	0	10.1	3125	-15	-11.7	1.5	11	373.5	13	0.1296	1.7	1.5	1	1	1	1	1	0.8	9.23	8.98	4	1	0.22	0.88	-0.2
14	V4	45	R	F	18	-13.75	-2.5	2	0.15	19	2631	0.15	0.05	-0.38	2	1	-0.75	15.6	2551	-19	-14.82	3	5	680.5	15	0.46403	2.24	3.22	1	1.29	1	2	1	1	13.75	13.37	4	1	1.04	1.43	0.97
15	V4	36	R	F	3	-10.9	-3	2	0	16.3	2398	0	0	0.13	1	1	-0.75	20.7	3067	-16	-12.48	2.5	5	858	2	0.23281	2.88	2.26	1	1	1	2	1	1.5	10.9	11.03	5	1	0.67	0.79	-0.62
16	V4	25	L	M	10	-11.38	-2.75	0.4	0.05	19	2217	0	0	0.13	1	1	-0.25	16.4	2247	-17.5	-13.65	3	2	587	12	0.08429	2.71	2.52	1.11	1.11	1	1	1	1	11.38	11.51	5	1	0.23	0.93	-0.2
17	V4	36	L	F	3	-10.61	-5	2	0.1	19.7	2347	0	0	-0.5	2	1	-0.5	24.7	2469	-17	-13.26	5.5	7	859.5	1	0.05695	4.76	4.5	1.25	1.25	1	1	1	1.5	10.61	10.11	4	2	0.27	0.95	-0.26
18	V4	35	R	M	8	-12.92	-1.5	2	0.15	15	3134	0.1	0	-1.5	7	2	-0.5	18	3101	-19	-14.82	1.5	4	702.5	8	0.19923	1.34	1.07	1.14	1.43	1	1	1	1.3	12.92	11.42	2	2	0.27	0.8	-0.27
19	V4	23	L	M	6	-11.12	-1.75	2	0	14	3125	0	0	-0.5	2	1	-1	10	2976	-17	-13.26	2.5	0	528	0	0.51922	1.49	0.75	1	1	1	2	1	1	11.12	10.62	4	1	0.77	0.5	-0.74
20	V4	35	L	M	8	-12.44	-1.5	2	0.15	14	3184	0.15	0.05	-0.5	2	1	-0.5	18.4	2757	-18.5	-14.43	1.5	6	705	19	0.19578	1.17	1.02	1	1.29	1	1	1	1.3	12.44	11.94	4	2	0.23	0.87	-0.16
21	V4	25	R	F	4	-13.45	-3.5	0.7	0	15.1	2985	0	0	-1.25	6	2	-1	16.9	3125	-21	-16.38	4	4	1074	4	0.2382	2.87	2.52	1	1	1	2	1	2	13.45	12.2	2	1	0.68	0.88	-0.35
22	V4	21	L	M	4	-6.57	-1.5	0.7	0	20	3344	0	0	-0.5	2	1	-0.5	14	2500	-11.5	-8.97	2	2	494	9	0.19386	1.29	1.1	1	1	1	1	1	1	6.57	6.07	4	2	0.25	0.85	-0.2
23	V4	28	R	F	3	-8.1	-1	1.7	0	9.5	3460	0	0	-0.5	2	1	-1	8.9	3484	-13	-10.14	1.5	5	1088	2	1	1	1.99	1	1	1	2	1	2	8.1	7.6	4	1	1	1.99	0.99
24	V4	37	L	F	2	-5.57	-2	0.52	0	8.9	2638	0	0	-0.5	2	1	-0.5	10.2	2304	-9.5	-7.41	3	1	435	2	0.11824	1.58	1.5	1	1	1	1	1	1	5.57	5.07	4	1	0.19	0.95	-0.08
25	V4c	18	R	F	7	-10.3	-4	2	0.1	17	3158	0	0	0.13	1	1	-1.25	18	2959	-14	-14	4	2.91	515	6	0.29245	3.74	2.75	1.25	1.25	1	3	1	1	10.3	10.43	5	1	1.09	0.74	-0.99
26	V4c	26	R	F	17	-4.5	-2	0.7	0	16	2954	-0.1	0	-0.25	1	1	-0.5	20.5	2882	-6.5	-6.5	2	1.11	804	2	0.1517	1.81	1.5	1.2	1	1	1	1	1.5	4.5	4.25	4	1	0.27	0.83	-0.31
27	V4c	21	L	F	5	-6	-3	1.3	0	21	3003	0	-0.2	-0.5	2	1	-0.5	21	3003	-8	-8	3	1	552	1	0.12907	2.76	2.31	1	1.5	1	1	1	1	6	5.5	4	2	0.36	0.84	-0.44
28	V4c	29	L	F	4	-8.88	-1.75	1.4	0	16	2999	0.1	0	0.13	1	1	-0.75	14	2890	-11	-11	1.5	5.31	527	4	0.31806	1.48	1	0.8	1	1	2	1	1	8.88	9.01	5	2	0.47	0.68	-0.48
29	V4c	22	L	F	3	-13.63	-2.25	2	0.1	18	3413	0	0	-1.25	6	2	-1	21.6	2994	-16	-16	2	3.9	1050	2	0.38575	2.06	1.25	1.25	1.25	1	2	1	2	13.63	12.38	2	2	0.8	0.61	-0.81
30	V4c	20	R	F	7	-13.75	-2.5	0.7	0.22	21.5	3119	0.15	0.1	-0.75	3	2	-1	19	2994	-15.5	-15.5	2	1.5	802.5	3	0.31323	2.32	1.71	1.17	1.33	1	2	1	1.5	13.75	13	3	2	0.73	0.74	-0.61
31	V4c	34	R	F	10	-8.75	-2	2	0	14	3278	0	-0.2	-0.13	1	1	-0.25	16.3	3165	-11	-11	2	6.23	777	2	0.09326	1.93	1.75	1	1.5	1	1	1	1.5	8.75	8.62	5	2	0.18	0.91	-0.18
32	V4c	19	R	F	15	-8.13	-1.75	1.6	0	20	3337	0	0	0.25	1	1	-0.5	21	3448	-10.5	-10.5	1.5	0.7	867	4	0.14402	1.46	1.25	1	1	1	1	1	1.5	8.13	8.38	6	2	0.21	0.86	-0.21
33	V4c	23	L	F	11	-11	-3	2	0.05	16	3581	0	0	-0.5	2	1	-0.5	16.2	3816	-14	-14	3	4.78	805.5	1	0.14645	2.87	2.58	1.11	1.11	1	1	1	1.5	11	10.5	4	1	0.42	0.9	-0.29
34	V4c	55	L	M	1	-9.38	-1.75	1.6	0	21	2557	0	0	0.13	1	1	-0.25	21	3155	-12.5	-12.5	1.5	9.57	633	3	0.07906	1.4	1.5	1	1	1	1	1	1	9.38	9.51	5	2	0.11	1.07	0.1
35	V4c	20	L	F	5	-11.63	-1.25	2	0.05	19	3223	0	0	0	1	1	-0.5	17.7	3067	-13.5	-13.5	1	7.1	534	5	0.32374	0.98	0.51	1.11	1.11	1	1	1	1.5	11.63	11.63	5	1	0.32	0.52	-0.47
36	V4c	26	L	F	17	-4.13	-2.25	0.7	0	15	2999	-0.1	0	-0.13	1	1	-0.25	16.3	2890	-6.5	-6.5	2.5	3.6	786	1	0.08275	2.19	2	1.2	1	1	1	1	1.5	4.13	4	5	2	0.18	0.91	-0.19
37	V4c	34	L	F	10	-9.13	-1.75	2	0	13	3303	0	-0.2	-0.38	2	1	-0.75	13.6	3401	-10.5	-10.5	1.5	5	517	1	0.33333	1.5	1	1	1.5	1	2	1	1	9.13	8.75	4	1	0.5	0.67	-0.5
38	V4c	22	R	M	6	-10.5	-2	1.7	0	14	3699	0	0	-0.13	1	1	-0.25	15	3745	-13	-13	2	5.1	817.5	1	0.11666	1.96	1.75	1	1	1	1	1	1.5	10.5	10.37	5	2	0.23	0.89	-0.21
39	V4c	18	L	F	7	-9.8	-4	1.6	0.22	18	3380	0	0	0.13	1	1	-0.75	18.1	2950	-13.5	-13.5	4	3.5	521	1	0.151	3.91	3.25	1.67	1.67	1	2	1	1	9.8	9.93	5	2	0.59	0.83	-0.66
40	V4c	22	L	M	6	-11.25	-1.5	1.7	0	15	3642	0.05	0	-0.25	1	1	-0.5	15	3802	-13	-13	1.5	5	829.5	0	0.32071	1.47	1	0.9	1	1	1	1	1.5	11.25	11	4	0	0.47	0.68	-0.47
41	V4c	19	L	F	15	-10.13	-1.75	1.7	0	20	3469	0	0	-0.13	1	1	-0.25	19.9	3040	-12.5	-12.5	1.5	3.27	294	2	0.01484	1.48	1.5	1	1	1	1	1	0.5	10.13	10	5	2	0.02	1.01	0.02
42	V4c	23	R	F	2	-11.63	-3.25	2	0.1	17	3634	0	0	-0.88	5	2	-0.75	15.2	3676	-14.5	-14.5	3	1.62	819	0	0.17998	3	2.56	1.25	1.25	1	2	1	1.5	11.63	10.75	3	0	0.54	0.85	-0.44
43	V4c	20	R	F	5	-11.13	-1.25	2	0	17	3340	0	0	0	1	1	-0.5	18.3	3115	-13	-13	1	2.8	531	6	0.26182	1.04	0.75	1	1	1	1	1	1.5	11.13	11.13	5	1	0.27	0.72	-0.29
44	V4c	22	R	F	3	-14.25	-3	2	0.1	18	3185	0.15	0	-0.5	2	1	-1	21.4	3333	-17	-17	2.5	0.76	1074	2	0.29473	2.63	2.1	0.88	1.25	1	2	1	2	14.25	13.75	4	2	0.78	0.8	-0.53
45	V4c	20	L	F	7	-14.25	-2.5	0.8	0.22	18.5	2856	0.15	0.05	-0.13	1	1	-0.25	19	2653	-16.5	-16.5	2.5	3.9	538	6	0.14957	2.51	2.27	1.17	1.5	1	1	1	1	14.25	14.12	5	1	0.37	0.9	-0.24
46	V4c	21	R	F	5	-7.5	-2.5	1.6	0	21	2832	0	-0.2	-0.5	2	1	-0.5	17	2832	-9	-9	2.5	0.31	568	4	0.14913	2.31	2	1	1.5	1	1	1	1	7.5	7	4	1	0.35	0.86	-0.31
47	V4c	29	R	F	4	-8.13	-2.25	1.4	0	15	2954	-0.1	0	0.25	1	1	-0.5	19	2882	-10.5	-10.5	2	0.31	517	4	0.12033	2.01	1.75	1.2	1	1	1	1	1	8.13	8.38	6	2	0.24	0.87	-0.26
48	V4c	26	L	M	5	-10	-3	0.8	0	15	3469	0	0	0.38	2	1	-0.25	17.4	3030	-12.5	-12.5	2.5	1.96	514	11	0.05787	2.65	2.78	1	1	1	1	1	1	10	10.38	6	1	0.15	1.05	0.13
